## Addendum: A case report of androgen receptor inhibitor therapy in recurrent high-grade serous ovarian cancer

Sewanti Limaye<sup>1</sup>, Prashant Kumar<sup>2,3,4</sup>, Ramya Pragya<sup>1</sup>, Janani Sambath<sup>3,4</sup>, Darshana Patil<sup>2</sup>, Ajay Srinivasan<sup>2</sup>, Sachin Apurva<sup>2</sup>, Navin Srivastava<sup>2</sup>, Sanket Patil<sup>2</sup>, Revati Patil<sup>2</sup>, Vineet Datta<sup>2</sup>, Dadasaheb Akolkar<sup>2</sup> and Rajan Datar<sup>2</sup>

<sup>1</sup>Kokilaben Dhirubhai Ambani Hospital and Medical Research Institute, Mumbai, Maharashtra, India

<sup>2</sup>Datar Cancer Genetics Limited, Nasik, Maharashtra, India

<sup>3</sup>Institute of Bioinformatics, International Technology Park, Bangalore, Karnataka, India

<sup>4</sup>Manipal Academy of Higher Education, Manipal, Karnataka, India

**Published:** August 04, 2022

**Copyright:** © 2022 Limaye et al. This is an open access article distributed under the terms of the [Creative Commons Attribution License](#) (CC BY 3.0), which permits unrestricted use, distribution, and reproduction in any medium, provided the original author and source are credited.

**Consent was added to this article:** The patient provided consent (by signing on a consent document) at the time of tumor tissue and blood sample collection stating willingness to:

- a. Provide the required sample for tumor molecular profiling.
- b. Research use of deidentified data including publication of (deidentified) findings.

Original article: Oncotarget. 2020; 11:4358–4363. <https://doi.org/10.18632/oncotarget.27809>
